# Supplementary material for: Glucokinase Variant Proteins Are Resistant to Fasting-Induced Uridine Diphosphate Glucose-Dependent Degradation in Maturity-Onset Diabetes of the Young Type 2 Patients
Source: MDPI journal article supplement (doi:10.3390/ijms242115842), 2023-10-31
Supplement: s1 [file s1]

## **Supplemental information for**

**Glucokinase variant proteins are resistant to uridine diphosphate glucose-dependent degradation in maturity-onset diabetes of the young type 2 patients.**

### **This pdf file includes:**

Abbreviations

Supplementary Figures S1 to S3

Clinical data

**Abbreviations**

BSA, bovine serum albumin

cIAP1, cellular inhibitor of apoptosis protein 1

CRBN, cereblon

CRL4, cullin ring ubiquitin ligase 4

CUL4, cullin 4

DDB1, damage-specific DNA binding protein 1

ELISA, enzyme-linked immunosorbent assay

ER, endoplasmic reticulum

FIRI, fasting immunoreactive insulin

FCS, fetal calf serum

FPG, fasting blood glucose

GCK, glucokinase

G1P, glucose-1-phosphate

G6P, glucose-6-phosphate

GLUT, glucose transporter

GSIS, glucose-induced insulin secretion

HOMA $\beta$ , homeostatic model assessment of  $\beta$ -cells

HOMA-IR, homeostatic model assessment for insulin resistance

HEK293T, Human embryo kidney 293T

IC<sub>50</sub>, 50% inhibitory concentration

IMiDs, Immunomodulatory drugs

IP, immunoprecipitation

KD, knockdown

MDM2, murine double minute 2

MODY, maturity-onset diabetes of the young

NEAA, non-essential amino acids solution

one-way ANOVA, one-way analysis of variance

OMIM, Online Mendelian Inheritance in Man

PNDM, permanent neonatal diabetes mellitus

PHHI, persistent hyperinsulinemic hypoglycemia in infancy

PBS, phosphate-buffered saline

PROTAC, proteolysis-targeting chimera

$R^2$ , coefficients of determination ( $R^2$ )

TCA cycle, tricarboxylic acid cycle

TCGA, The Cancer Genome Atlas

UDP-glucose, uridine diphosphate glucose

UGGT, UDP-glucose:glycoprotein glucosyltransferase

UGP2, UDP-glucose pyrophosphorylase 2

UPR, unfolded protein response

VHL, von Hippel-Lindau

WB, Western blot

WT, wild type



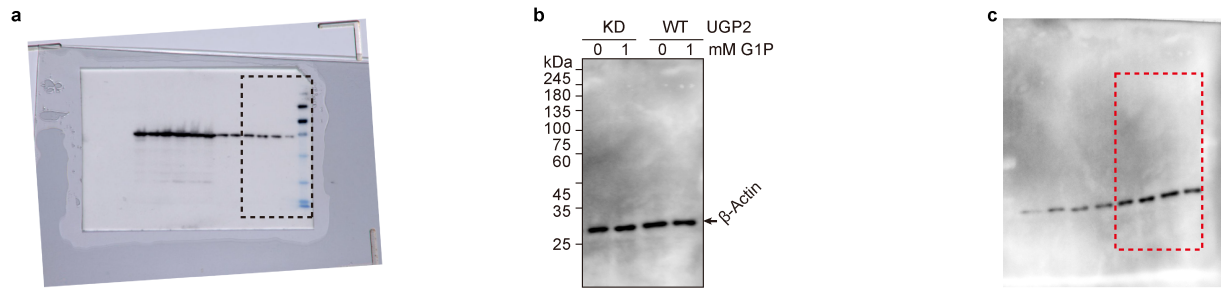

**Supplementary Figure S2. Low glucose induced UDP-glucose-dependent glucokinase ubiquitination and degradation (Supplementary data for Figure 1).**

The administration of G1P had no discernible impact on the quantity of glucokinase protein.

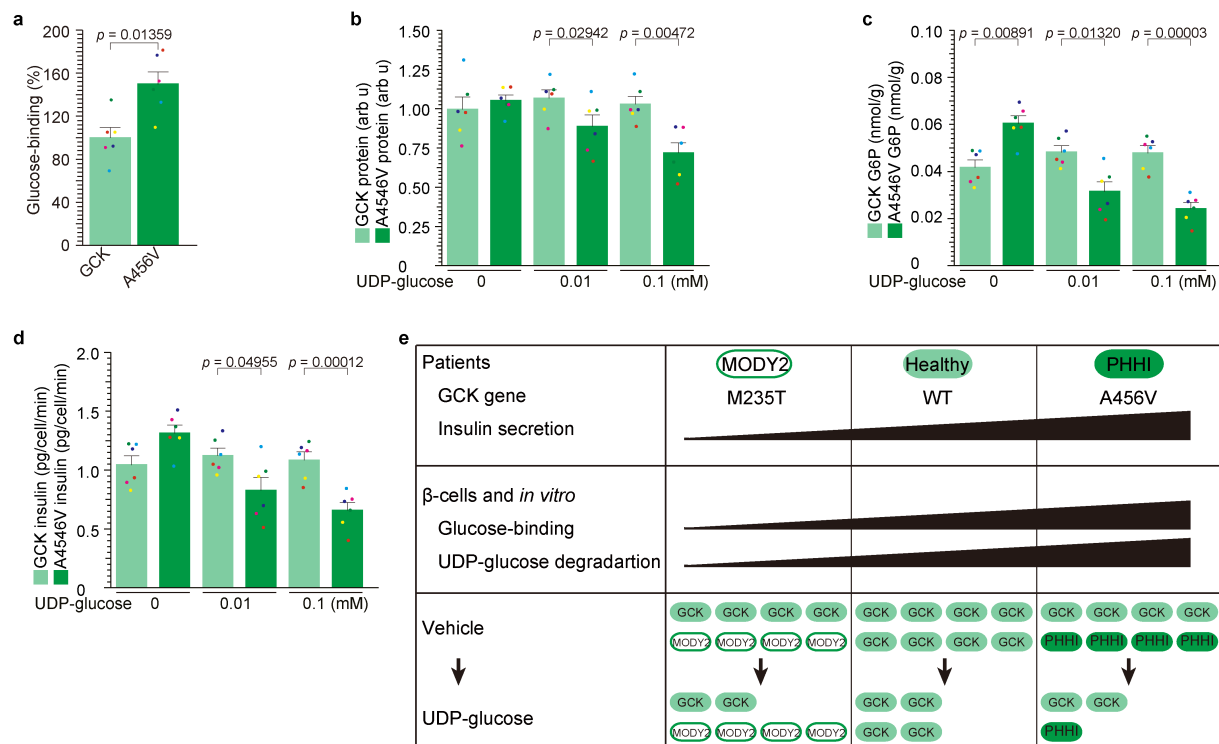

**Supplementary Figure S3. Optimizing Substrate Protein Glucokinase for UDP-Glucose-Dependent Ubiquitination and Degradation (Supplementary data for Fig. 3).**

**(a)** The A456V glucokinase variant from PHHI exhibited a strong binding affinity for **glucose**. The glucose-binding activity of glucokinase WT (GCK) and A456V (PHHI) was assessed using glucose-immobilized beads [1].

**(b –d)** A456V demonstrated greater sensitivity to UDP-glucose-dependent glucokinase **protein degradation (b)**, G6P production **(c)**, and insulin secretion **(d)**. UDP-glucose-dependent GCK and A456V degradation **(b)**, G6P production **(c)**, and insulin secretion **(d)** were analyzed.

| MODY2変異        | MODY2 |      | MODY2      |            |      |          |      |           |
|----------------|-------|------|------------|------------|------|----------|------|-----------|
|                | FPG   | FIRI | HOMA-B     | HOMA-R     | I.I  | 初診時HbA1c | BMI  | onset age |
| GCK A53V       | 139   | 7    | 33.1578947 | 2.40246914 | 0.38 | 6.2      | 14.6 | 11        |
| GCK T209R      | 121   | 14   |            |            | 0.49 | 6.7      | 19.7 | 10        |
| GCK K56T       | .     | .    |            |            | .    | .        | .    | .         |
| K p.S280LfsTer | 128   | 5    | 27.6923077 | 1.58024691 | 0.52 | 5.9      | 18.8 | 14        |
| GCK Gly193Trp  | 122   | 10   | 61.0169492 | 3.01234568 | 0.68 | 6.5      | 16.2 | 14        |
| c.1254 IVS9 -1 | 123   | 5    | 30         | 1.51851852 | .    | 6        | 21.5 | 6         |
| GCK E242V      | .     | .    |            |            | .    | .        | 17.0 | 6         |
| GCK M37V       | 123   | .    |            |            | 0.17 | 5.7      | .    | 11        |
| e348AsnとPro    | 145   | 2.6  | 11.4146341 | 0.9308642  | 0.1  | 7        | 14.8 | 0         |
| GCK A188T      | .     | .    |            |            | .    | .        | .    | .         |
| exon1のdelet.   | .     | .    |            |            | .    | .        | 18.2 | 16        |
| GCK: IVS1+1G>T | .     | .    |            |            | .    | 6.3      | 20.4 | 6         |
| GCK A379E      | .     | .    |            |            | .    | 6.2      | .    | 0         |
| delCAGAATG; p  | 119   | 4.97 | 31.95      | 1.46032099 | 0.58 | 5.7      | 17.8 | 18        |
| GCK E442Ter    | 113   | 3.7  | 26.64      | 1.03234568 | 0.44 | 5.3      | 20.1 | 22        |
| エクソンdele       | 122   | 8.88 | 54.1830508 | 2.67496296 | .    | 6.5      | 16.3 | 15        |
| GCK Arg43Cys   | 120   | 12   | 75.7894737 | 3.55555556 | 0.54 | 6.1      | 15.4 | 10        |
| GCK G261E      | 109   | 2.45 | 19.173913  | 0.65938272 | .    | 6.2      | 14.4 | 7         |
| c.863 IVS7 +1  | .     | .    |            |            | .    | 6.1      | 18.1 | 5         |
| GCK Gly264Ser  | 107   | 3.7  | 30.2727273 | 0.97753086 | 0.32 | 5.9      | 21.1 | 19        |
| GCK:Met235Thr  | 118   | 0.97 | 6.34909091 | 0.28261728 | 0.18 | 6.4      | 14.4 | 6         |
| GCK M381R      | .     | .    |            |            | .    | 7        | 22.9 | 18        |
| GCK:Gly261Arg  | .     | .    |            |            | .    | 5.8      | 13.4 | 2         |
| Thr376_Ala378  | 127   | 5    | 28.125     | 1.56790123 | 0.24 | 6.7      | 13.8 | 8         |
| GCK:Gly261Arg  | 118   | 4.7  | 30.7636364 | 1.36938272 | 0.72 | 6.7      | 14.6 | 13        |
| GCK G170A      | 122   | 3.87 | 23.6135593 | 1.16577778 | 0.3  | 5.8      | 17.5 | 25        |
| GCK L386P      | 113   | 9.4  | 67.68      | 2.62271605 | 0.56 | 6.2      | 22.7 | 8         |
| GCK R358Ter    | 126   | .    |            |            | .    | 6.2      | 15.5 | 10        |
| GCK Asn254Ser  | 123   | 3.3  | 19.8       | 1.00222222 | .    | 6.2      | 18.8 | 5         |
| Glu442ArgfsTer | 121   | 7.4  | 45.9310345 | 2.2108642  | 0.53 | 6.6      | 18.4 | 23        |
| GCK Gly44Ser   | 133   | 3.6  | 18.5142857 | 1.18222222 | 0.29 | 6.4      | 14.2 | 8         |
| GCK Thr206Met  | 124   | 8.6  | 50.7540984 | 2.63308642 | 0.67 | 6.3      | 17.1 | 11        |
| GCK R186Ter    | 127   | 3.7  | 20.8125    | 1.16024691 | 0.16 | 7.4      | 14.6 | 10        |
| GCK Y289H      | 125   | 5    | 29.0322581 | 1.54320988 | 0.2  | 6.8      | 18.4 | 8         |
| GCK Ser151del  | 121   | 5.2  | 32.2758621 | 1.55358025 | 0.2  | 6.6      | 18.0 | 3         |
| K D187EfsTer   | 138   | 7.3  | 35.04      | 2.48740741 | .    | 7.4      | 16.8 | 12        |
| GCK D278G      | 117   | 3.89 | 25.9333333 | 1.12377778 | 0.55 | 6.6      | 19.2 | 14        |
| GCK A188T      | .     | .    |            |            | .    | 6.7      | 17.8 | 12        |
| GCK G175A      | 131   | 5.5  | 29.1176471 | 1.77901235 | 0.14 | 6.7      | 22.4 | 8         |
| GCK G162R      | 113   | 9.4  | 67.68      | 2.62271605 | 0.56 | 6.4      | 22.7 | 8         |
| GCK F260I      | 114   | 3.2  | 22.5882353 | 0.90074074 | 0.41 | 6.8      | 21.9 | 5         |
| GCK Pro59Ser   | 134   | 5    | 25.3521127 | 1.65432099 | .    | 7.6      | 15.2 | 5         |
| CK Ser336Trp   | 117   | 5.3  | 35.3333333 | 1.53111111 | 0.47 | 7.6      | 20.1 | 19        |
| GCK A387V      | .     | .    |            |            | .    | 6.5      | 18.7 | 3         |
| GCK ex1a欠損     | 113   | 0.5  | 3.6        | 0.13950617 | 0.3  | 6.4      | 16.0 | 1         |
| GCK G261R      | 106   | 4.3  | 36         | 1.1254321  | 0.29 | 6.6      | 14.1 | 11        |
| GCK Q239R      | 132   | 2.5  | 13.0434783 | 0.81481481 | .    | 9.4      | 22.1 | 13        |
| GCK E442Ter    | 126   | 6.5  | 37.1428571 | 2.02222222 | .    | 6.8      | 18.2 | 29        |
| T228M          | 153   | 7.5  | 30         | 2.83333333 | 0.6  | 6.7      | 15.4 | 14        |
| GCK ex1a欠損     | 116   | 10.3 | 69.9622642 | 2.95012346 | .    | 6.5      | 17.3 | 14        |

|              |     |      |            |            |      |     |      |    |
|--------------|-----|------|------------|------------|------|-----|------|----|
| A370P        | 115 | .    |            |            | .    | 6.5 | 19.4 | 21 |
| GCK M381R    | 132 | 5.1  | 26.6086957 | 1.66222222 | .    | 6.6 | 18.3 | 4  |
| GCK R369P    | 114 | 3.3  | 23.2941176 | 0.92888889 | .    | 6.4 | 19.1 | 35 |
| GCK T206M    | 163 | 38.4 | 138.24     | 15.4548148 | .    | 6.8 | 19.2 | 13 |
| Tyr289MetfsT | 183 | .    |            |            | .    | 6.8 | 21.3 | 13 |
| GCK V253F    | 131 | .    |            |            | .    | 6.6 | 22.4 | 37 |
| GCK L58P     | 133 | 9.3  | 47.8285714 | 3.05407407 | .    | 6.3 | 15.0 | 6  |
| GCK S375P    | 122 | 3.3  | 20.1355932 | 0.99407407 | .    | 6.8 | 16.3 | 9  |
| GCK R36W     | 120 | 5.1  | 32.2105263 | 1.51111111 | 0.32 | 6.3 | 21.4 | 17 |
| GCK A188T    | 91  | .    |            |            | .    | 6.4 | 20.5 | 25 |
| GCK M235T    | 141 | .    |            |            | .    | 6.7 | 15.4 | 5  |
| GCK G448C    | 139 | 8.1  | 38.3684211 | 2.78       | 0.36 | 5.8 | 20.5 | 26 |
| GCK E256K    | 117 | 3.4  | 22.6666667 | 0.98222222 | .    | 6.9 | 19.4 | 13 |
| GCK E442Ter  | 147 | 5.6  | 24         | 2.03259259 | 0.27 | 6.7 | 15.0 | 10 |
| GCK Y296Ter  | 115 | .    |            |            | .    | 6.7 | 15.7 | 6  |
| CK IVS7+1 G> | 122 | 4.3  | 26.2372881 | 1.29530864 | .    | 6.7 | 13.6 | 6  |
